# Supplementary material for: Profiling molecular and behavioral circadian rhythms in the non-symbiotic sea anemone Nematostella vectensis
Source: PubMed Central journal article supplement (PMC4476465; doi:10.1038/srep11418), 2015-06-17
Supplement: srep11418-s1.pdf [file srep11418-s1.pdf]

Profiling molecular and behavioral circadian rhythms in the non-symbiotic sea anemone  
*Nematostella vectensis*

Matan Oren<sup>1\*#</sup>, Ann M. Tarrant<sup>2#</sup>, Shahar Alon<sup>3,4</sup>, Noa Simon-Blecher<sup>1</sup>, Idan Elbaz<sup>1,5</sup>, Lior Appelbaum<sup>1,5</sup>, Oren Levy<sup>1\*</sup>

<sup>1</sup>The Mina & Everard Goodman Faculty of Life Sciences, Bar-Ilan University, Ramat-Gan 52900, Israel

<sup>2</sup>Biology Department, Woods Hole Oceanographic Institution, Woods Hole MA 02543, USA

<sup>3</sup>George S. Wise Faculty of Life Sciences, Department of Neurobiology, Tel-Aviv University, Tel-Aviv 69978, Israel,

<sup>4</sup>Sagol School of Neuroscience, Tel-Aviv University, Tel-Aviv 69978, Israel,

<sup>5</sup>The Leslie and Susan Gonda Multidisciplinary Brain Research Center, Bar-Ilan University, Ramat-Gan, Israel

\*Corresponding authors: Matan Oren & Oren Levy

e-mail: [matanok@gmail.com](mailto:matanok@gmail.com); [oren.levy@biu.ac.il](mailto:oren.levy@biu.ac.il)

# These authors contributed equally in this work.

## Supplementary Figure S1

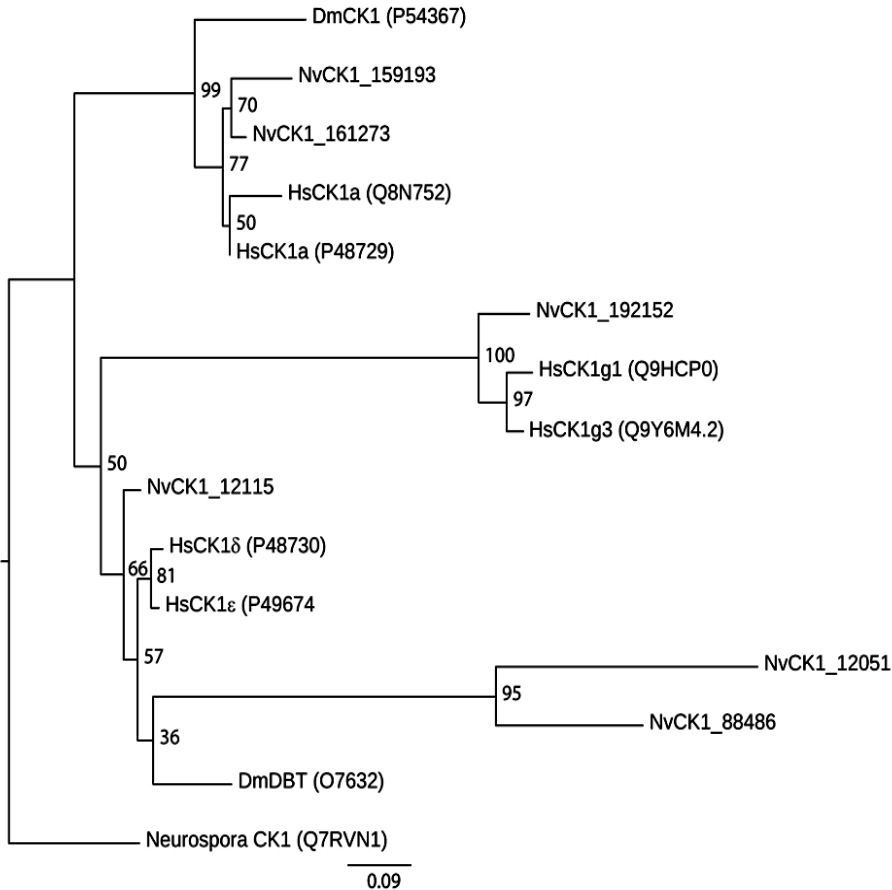

Phylogenetic tree showing relationships among CK1 genes from *Drosophila melanogaster* (Dm), *Homo sapiens* (Hs), *Nematostella vectensis* (Nv), and *Neurospora crassa* (Neurospora). Sequences were aligned using Muscle [1](#), and a likelihood-based tree constructed with the WAG+G+F substitution model using RAxML [2](#). Numbers on nodes represent the percentage of 1000 replicates supporting a given grouping. Genbank accession numbers given parenthetically. For *Nematostella* sequences, JGI accession numbers are given following the underscore.

### References

1. Edgar, R.C. MUSCLE: multiple sequence alignment with high accuracy and high throughput. *Nucleic Acids Res* 2004, **32**(5):1792-1797.
2. Stamatakis, A. RAxML-VI-HPC: maximum likelihood-based phylogenetic analyses with thousands of taxa and mixed models. *Bioinformatics* 2006, **22**:2688-2690.
